# Supplementary material for: Influence of the Nitrate-N to Ammonium-N Ratio on Relative Growth Rate and Crude Protein Content in the Duckweeds Lemna minor and Wolffiella hyalina
Source: MDPI journal article supplement (doi:10.3390/plants10081741), 2021-08-23
Supplement: s1 [file s1]

Table S1: tap water analysis municipal utilities Osnabrueck Wittefeld

| substance | unit               | german drinking<br>water ordinance<br>limits | measured<br>concentration |
|-----------|--------------------|----------------------------------------------|---------------------------|
| boron     | mg L <sup>-1</sup> | 1                                            | 0.02                      |
| nitrate   | mg L <sup>-1</sup> | 50                                           | 7.7                       |
| ammonium  | mg L <sup>-1</sup> | 0.5                                          | <0.02                     |
| chloride  | mg L <sup>-1</sup> | 250                                          | 32                        |
| iron      | mg L <sup>-1</sup> | 0.2                                          | 0.014                     |
| manganese | mg L <sup>-1</sup> | 0.05                                         | -                         |
| sodium    | mg L <sup>-1</sup> | 200                                          | 17.4                      |
| sulfate   | mg L <sup>-1</sup> | 250                                          | 94                        |
| potassium | mg L <sup>-1</sup> | -                                            | 3.26                      |
| calcium   | mg L <sup>-1</sup> | -                                            | 49.5                      |
| magnesium | mg L <sup>-1</sup> | -                                            | 7.5                       |
