# Supplementary material for: Influence of the Nitrate-N to Ammonium-N Ratio on Relative Growth Rate and Crude Protein Content in the Duckweeds Lemna minor and Wolffiella hyalina
Source: MDPI journal article supplement (doi:10.3390/plants10081741), 2021-08-23
Supplement: s1 [file s1]

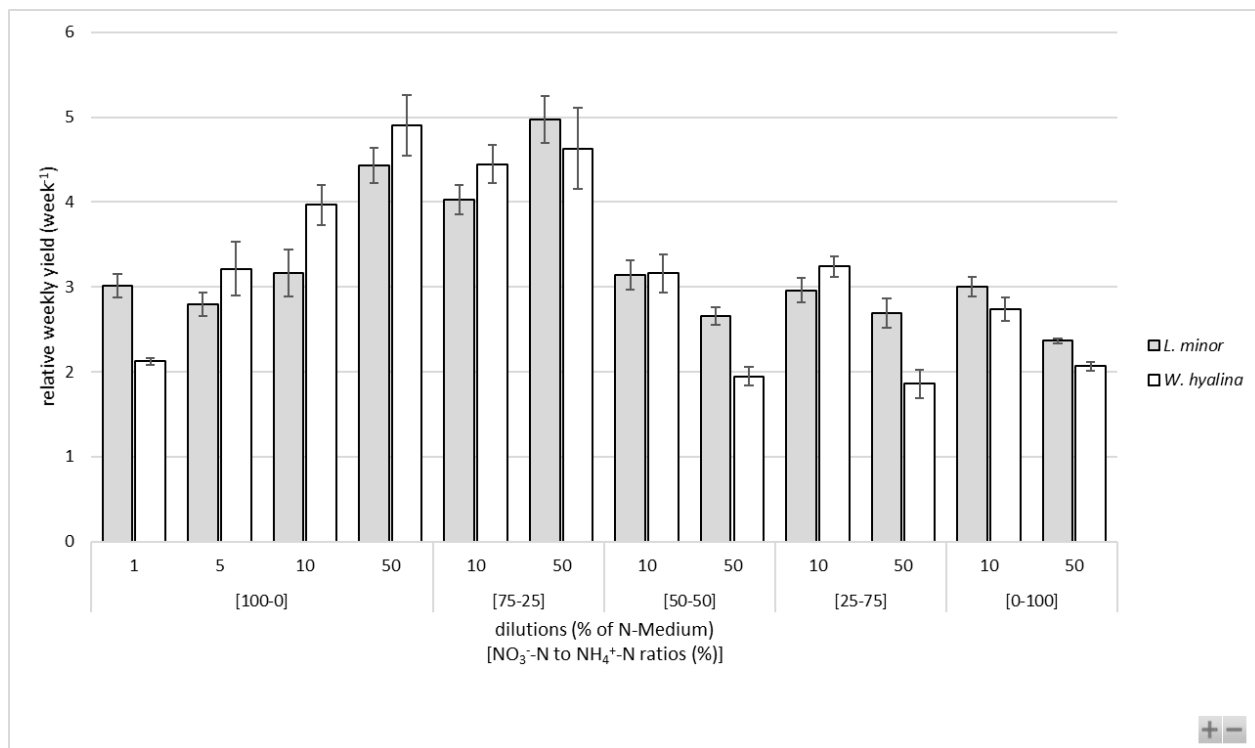

Figure S1: relative weekly yield (RY, week<sup>-1</sup>) based on DW, for *L. minor* (grey shaded columns) and *W. hyalina* (white columns), cultivated for seven days in nutrient solutions with different NO<sub>3</sub><sup>-</sup>-N to NH<sub>4</sub><sup>+</sup>-N ratios in different dilutions, based on N-medium. For further explanations, see Fig. 1.
